RESEARCH ARTICLE

# Use of C-reactive protein for the early prediction of anastomotic leak after esophagectomy: Systematic review and Bayesian meta-analysis

Alberto Aiolfi, Emanuele Asti, Emanuele Rausa, Giulia Bonavina, Gianluca Bonitta, Luigi Bonavina<sup>1</sup>\*

Department of Biomedical Sciences for Health, Division of General Surgery, University of Milan, IRCCS Policlinico San Donato, Milan, Italy

\* [luigi.bonavina@nimi.it](mailto:luigi.bonavina@nimi.it)

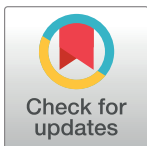

## Abstract

### Background

Early suspicion, diagnosis, and timely treatment of anastomotic leak after esophagectomy is essential. Retrospective studies have investigated the role of C-reactive protein (CRP) as early marker of anastomotic leakage. The aim of this systematic review and meta-analysis was to evaluate the predictive value of CRP after esophageal resection.

### Methods

A literature search was conducted to identify all reports including serial postoperative CRP measurements to predict anastomotic leakage after elective open or minimally invasive esophagectomy. Fully Bayesian meta-analysis was carried out using random-effects model for pooling diagnostic accuracy measures along with CRP cut-off values at different postoperative day.

### Results

Five studies published between 2012 and 2018 met the inclusion criteria. Overall, 850 patients were included. Ivor-Lewis esophagectomy was the most common surgical procedure (72.3%) and half of the patients had squamous-cell carcinoma (50.4%). The estimated pooled prevalence of anastomotic leak was 11% (95% CI = 8–14%). The serum CRP level on POD3 and POD5 had comparable diagnostic accuracy with a pooled area under the curve of 0.80 (95% CIs 0.77–0.92) and 0.83 (95% CIs 0.61–0.96), respectively. The derived pooled CRP cut-off values were 17.6 mg/dl on POD 3 and 13.2 mg/dl on POD 5; the negative likelihood ratio were 0.35 (95% CIs 0.096–0.62) and 0.195 (95% CIs 0.04–0.52).

### Conclusion

After esophagectomy, a CRP value lower than 17.6 mg/dl on POD3 and 13.2 mg/dl on POD5 combined with reassuring clinical and radiological signs may be useful to rule-out

## OPEN ACCESS

**Citation:** Aiolfi A, Asti E, Rausa E, Bonavina G, Bonitta G, Bonavina L (2018) Use of C-reactive protein for the early prediction of anastomotic leak after esophagectomy: Systematic review and Bayesian meta-analysis. PLoS ONE 13(12): e0209272. <https://doi.org/10.1371/journal.pone.0209272>

**Editor:** Hyun-Sung Lee, Baylor College of Medicine, UNITED STATES

**Received:** July 5, 2018

**Accepted:** December 3, 2018

**Published:** December 17, 2018

**Copyright:** © 2018 Aiolfi et al. This is an open access article distributed under the terms of the [Creative Commons Attribution License](https://creativecommons.org/licenses/by/4.0/), which permits unrestricted use, distribution, and reproduction in any medium, provided the original author and source are credited.

**Data Availability Statement:** All relevant data are within the paper and its Supporting Information files.

**Funding:** The authors received no specific funding for this work.

**Competing interests:** The authors have declared that no competing interests exist.

leakage. In the context of ERAS protocols, this may help to avoid contrast radiological studies, anticipate oral feeding, accelerate hospital discharge, and reduce costs.

## Introduction

Esophageal resection, the therapeutic gold-standard in esophageal carcinoma, carries high morbidity and mortality rates that have remained unchanged in the minimally invasive surgery era [1]. Pneumonia and anastomotic leakage still represent the major postoperative complications, despite significant heterogeneity in definition [2–5]. Early suspicion of anastomotic leak is desirable to exclude patients from enhanced recovery pathways, thereby delaying oral feeding and improving the prognosis of sub-clinical leaks [6].

Inflammatory biomarkers like C-reactive protein (CRP), procalcitonin, and white blood cell count have been proposed for early diagnosis of surgical and infectious complications after major surgery [7–12]. A previous systematic review and meta-analysis has shown that CRP is a useful negative predictive test to rule out anastomotic leak in elective colorectal surgery [13]. However, despite the introduction of complex risk models, the clinical utility of biomarkers to predict anastomotic leaks after esophagectomy has never been consistently demonstrated, and no previous meta-analyses on this topic have been performed yet [14–15].

The aim of this systematic review and Bayesian meta-analysis was to investigate the role of CRP as predictive biomarker of anastomotic leak in patients undergoing elective esophagectomy for carcinoma.

## Materials and methods

We conducted this study according to the Preferred Reporting Items for Systematic Reviews and Meta-analyses (PRISMA) statement [16]. An extensive literature search, until May 31<sup>st</sup> 2018, was conducted by two independent authors (AA, ER) to identify the English-written published series on the predictive value of CRP level for anastomotic leakage in patients who underwent elective esophageal resection for cancer. Pubmed, MEDLINE, Embase, and Cochrane databases were consulted matching the terms “esophagectomy” OR “esophageal resection” AND “C-reactive protein” OR “CRP”. The reference lists of all relevant articles were searched manually to identify further relevant studies.

Abstracts, case reports, case series, and non-English written articles were excluded. Relevant studies not allowing a predictive analysis for anastomotic leak were excluded (Fig 1). Two authors (AA, ER) independently extracted data from eligible studies. Data extracted included study characteristics (first author name, year, journal of publication), number of patients, time frame, demographic and preoperative clinical characteristics, surgical approach, and postoperative outcomes. The outcome of interest was anastomotic leakage, which was counted per event and defined as reported in the included studies. Measures of diagnostic accuracy, including area under the receiver operating characteristic curve (AUC), sensitivity, specificity, positive predictive value (PPV) and negative predictive value (NPV), were recorded to enable a diagnostic meta-analysis to be performed. To obtain a summary graph of postoperative CRP levels, CRP data reported in the text, graphs or figures of the included studies were used and/or digitalized to obtain the median or mean CRP value on each POD. Corresponding authors were contacted to obtain the necessary data when they were not available from the article. Disagreements between authors were resolved by consensus; if no agreement could be reached, a third senior author (LB) made the decision.

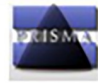

PRISMA 2009 Flow Diagram

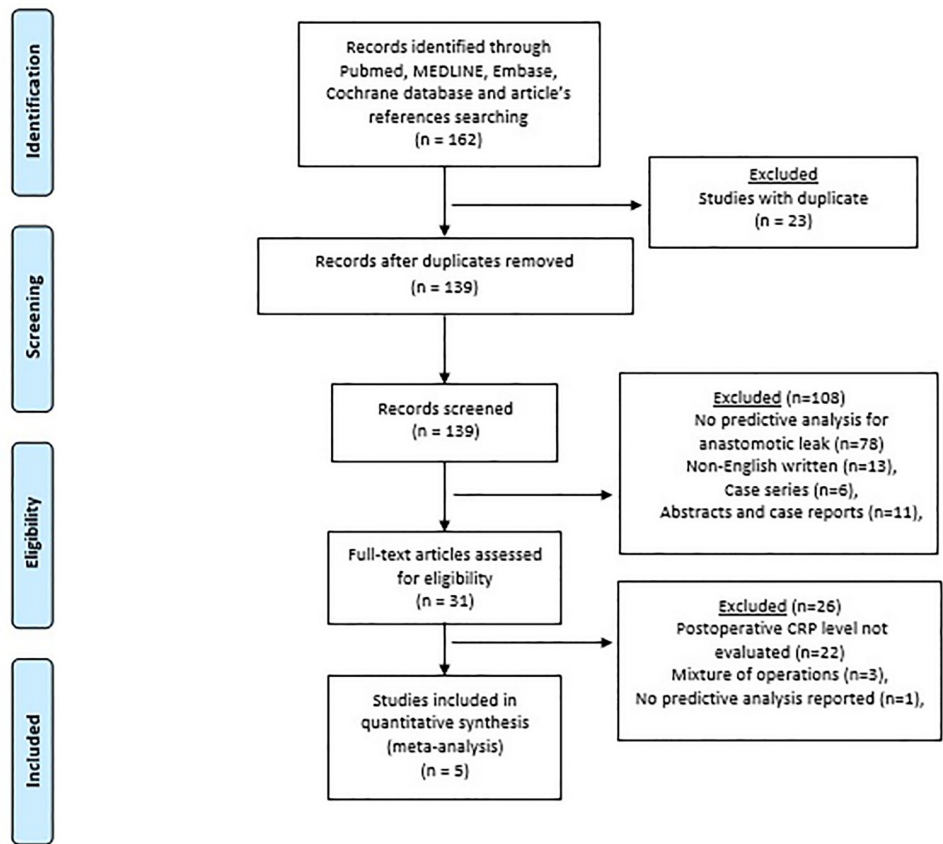

Fig 1. The Preferred Reporting Items for Systematic Reviews and Meta-Analyses (PRISMA) diagram.

<https://doi.org/10.1371/journal.pone.0209272.g001>

Three investigators independently evaluated the methodological quality of the papers using the Quality Assessment of Diagnostic Accuracy Studies (QUADAS-2) tool [17]. This assessed the risk of bias and concerns about applicability by evaluating four key domains: patient selection, index test, reference standard, and flow of patients through the study and timing of tests.

### Statistical analysis

Bivariate meta-analysis was conducted using a fully Bayesian approach via integrated nested Laplace approximations (INLA). Compared to traditional meta-analyses, the Bayesian approach takes into account all sources of variation and reflects these variations in the pooled result [18–19]. Furthermore, the Bayesian approach can provide more accurate estimates for small samples [20]. Chu and Cole bivariate generalized linear mixed effects with exact binomial likelihood model was used to summarize the results of several diagnostic studies by modelling sensitivity and specificity jointly (binomial-normal model) [21]. We assume that both sensitivity and specificity was modelled with the same logit link function. Normal prior with zero mean and 100 variance is used for the fixed effects. Variance components of random effect were modelled using penalized complexity priors choosing the parameters believing that the sensitivities or specificities lie in the interval [0.5, 0.95] with probability 0.95, according to

Wakefield [22–23]. The binomial-normal model was also used to calculate the hierarchical summary receiver operating characteristic (HSROC) model according to Rutter and Gatsonis [24]. Uniform distribution on [-1,1] was the choice for a vague prior of the random effects correlation parameter. Pooled likelihood ratios and pooled diagnostics odds ratio (DOR) were computed sampling from approximated posterior distribution. The 95% bias-corrected and accelerated (BCa) bootstrap confidence interval for cut-off. The pooled prevalence of anastomotic leak was calculated as described elsewhere [25]. Standard error for postoperative CRP levels was estimated with the GetData Graph Digitizer software by two independent authors (AA, ER) [26]. The pooled mean CRP dosages in different postoperative days were estimated using Bayesian normal likelihood model with inverse gamma non informative prior for variability. Credible intervals (CIs) were computed. Statistical significance is set when 95% CIs involved. All analyses and figures were carried out using R software package version 3.4.3 [27].

## Results

### Systematic review

Five studies published between 2012 and 2018 met the inclusion criteria. Overall, 850 patients were included (range 45–258). All reports were observational, cohort studies. The definition of esophageal anastomotic leak used in the individual studies is reported in Table 1. Demographic, clinical, and operative variables of the patient sample are shown in Table 2. Patients' age ranged from 37 to 85 years, and the majority (82.5%) were males. The ASA score was reported in five studies and the BMI in four studies. Esophagectomy was performed via an open or minimally invasive approach; the most common procedure was the Ivor-Lewis (72.3%) followed by the McKeown esophagectomy (14.6%). Squamous-cell carcinoma was the most common histological type (50.4%) followed by adenocarcinoma (46.9%). Tumor histology was not reported in one study. Only one study reported the results stratified according to the use of neoadjuvant therapy; the other studies did not differentiate the patients and results were reported as aggregated. The overall anastomotic leak rate was 11.5%.

The results of quality assessment using the QUADAS-2 tool are shown in Fig 2. Overall, the applicability of included studies was good. The included studies reported measuring CRP in the postoperative period according to different institutional protocols. Patients were stratified on the presence of anastomotic leak (AL group) or no complications (NC group). Five studies reported CRP levels on POD2, 5 studies on POD3, 4 studies on POD4, 5 studies on POD5, 4 studies on POD6 and 5 studies on POD7. Cut-off CRP values were reported in 5 studies on

**Table 1. Definition of anastomotic leak.**

| Reference          | Definition/diagnosis of anastomotic leak                                                                                                                                                                                                              |
|--------------------|-------------------------------------------------------------------------------------------------------------------------------------------------------------------------------------------------------------------------------------------------------|
| Noble et al. [28]  | Leak sufficient to cause symptoms and confirmed by radiology (contrast-enhanced multi-detector CT scan with on-table oral contrast or water-soluble contrast studies), endoscopy or surgical exploration                                              |
| Hoeboer et al. [9] | Esophagoenteric leak confirmed by endoscopy or esophageal contrast videography that requires local treatment, surgical treatment, or removal of conduit.                                                                                              |
| Gordon et al. [29] | Extravasation of oral contrast material seen on cross-sectional imaging or an anastomotic defect visualized intraoperatively on return to theatre. Endoscopy was not used to diagnose AL.                                                             |
| Park et al. [11]   | Disruption of the anastomosis that leads to outflow of the intraluminal content, which is obvious leaks, as well as leaks without the presence of any clinical symptoms but with only occult leaks detected with esophagography followed by chest CT. |
| Asti et al. [6]    | Anastomotic leakage was suspected by the presence of clinical signs and confirmed by extravasation of oral contrast at gastrographin swallow study and/or CT scan, and/or visualization of anastomotic defect at upper gastrointestinal endoscopy.    |

<https://doi.org/10.1371/journal.pone.0209272.t001>

**Table 2. Summary of the studies included in the meta-analysis.** nr: not reported. SCC: Squamous cell carcinoma. ADK Adenocarcinoma. IVL: Ivor-Lewis esophagectomy. LTA: left thoracotomic approach.

| Reference               | Study design           | No. patients | Mean age   | M/F     | Histology (n)                  | Neoadjuvant therapy (n) | Surgical approach (n)                               | Anastomotic leak (n) |
|-------------------------|------------------------|--------------|------------|---------|--------------------------------|-------------------------|-----------------------------------------------------|----------------------|
| Noble et al, 2012 [28]  | Retrospective          | 258          | 67 (37–85) | 202, 56 | nr                             | 156                     | IVL (112), McKeown (51), LTA (52), Transhiatal (43) | 26                   |
| Hoeboer et al, 2015 [9] | Prospective            | 45           | 62.5 ± 15  | 39, 6   | SCC (11), ADK (31), Other (3)  | 40                      | Transhiatal (16), Transthoracic (29)                | 10                   |
| Gordon et al, 2016 [29] | Retrospective          | 103          | 60 ± 15    | 79, 24  | SCC (9), ADK (90), Other (4)   | nr                      | IVL (103)                                           | 10                   |
| Park et al, 2017 [11]   | Retrospective (non-NT) | 156          | 63.9 ± 9   | 184, 17 | SCC (201)                      | 0                       | IVL (170), McKeown (31)                             | 15                   |
|                         | Retrospective (NT)     | 45           |            |         |                                | 45                      |                                                     | 8                    |
| Asti et al, 2018 [6]    | Retrospective          | 243          | 61.7 ± 16  | 197, 46 | SCC (77), ADK (157), Other (9) | 96                      | IVL (201), McKeown (42)                             | 29                   |

<https://doi.org/10.1371/journal.pone.0209272.t002>

POD3, 2 studies on POD4, and 3 studies on POD5. The pooled postoperative CRP dosages in the two groups are showed in Fig 3 ( $p < 0.05$ ).

### Meta-analysis

In addition to a systematic review, we performed a study-level fully Bayesian meta-analysis. Considering the random effect bivariate model, the estimated pooled POD3 CRP cut-off, resulting from 4 studies and 592 patients, is 17.6 mg/dl (95% CI 14.9–20 mg/dl). The estimated pooled sensibility is 0.74 (95% CIs 0.56–0.91) (Fig 4a) and the pooled specificity is 0.73 (95% CIs 0.65–0.81) (Fig 4b). The estimated pooled AUC is 0.80 (95% CIs 0.77–0.92). The pooled positive LR is 2.78 (95% CIs 1.87–4.09) and the pooled negative LR is 0.35 (95% CIs 0.096–0.62). The diagnostic OR is 8.0 (95% CIs 3.20–32.70). The summary ROC curve and the summary estimates of sensitivity and specificity are reported in Fig 5a. The cross air plot showed a non-typical shoulder arm appearance, indicating the absence of threshold effect due to difference in cut-off values (Fig 5b). The calculated correlation between sensitivity and specificity was 0.24 suggesting no threshold effect.

The estimated pooled POD4 CRP cut-off, resulting from 2 studies with 361 patients, is 17.7 mg/dl (95% CI 17.3–17.65 mg/dl). The pooled sensibility is 0.83 (95% CIs 0.50–0.97) (Fig 6a) and the pooled specificity is 0.56 (95% CIs 0.24–0.85) (Fig 6b). The estimated pooled AUC is 0.82 (95% CIs 0.77–0.98). The summary ROC curve and the summary estimates of sensitivity and specificity are reported in Fig 7. The pooled positive LR is 1.88 (95% CIs 0.81–7.0) and the pooled negative LR is 0.30 (95% CIs 0.03–1.49). The diagnostic OR is 6.53 (95% CIs 0.48–

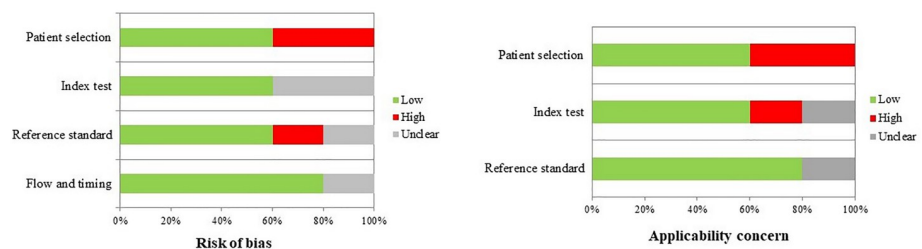

**Fig 2. Quality assessment (QUADAS-2).** Proportion of studies with low, high, or unclear risk of bias, %.

<https://doi.org/10.1371/journal.pone.0209272.g002>

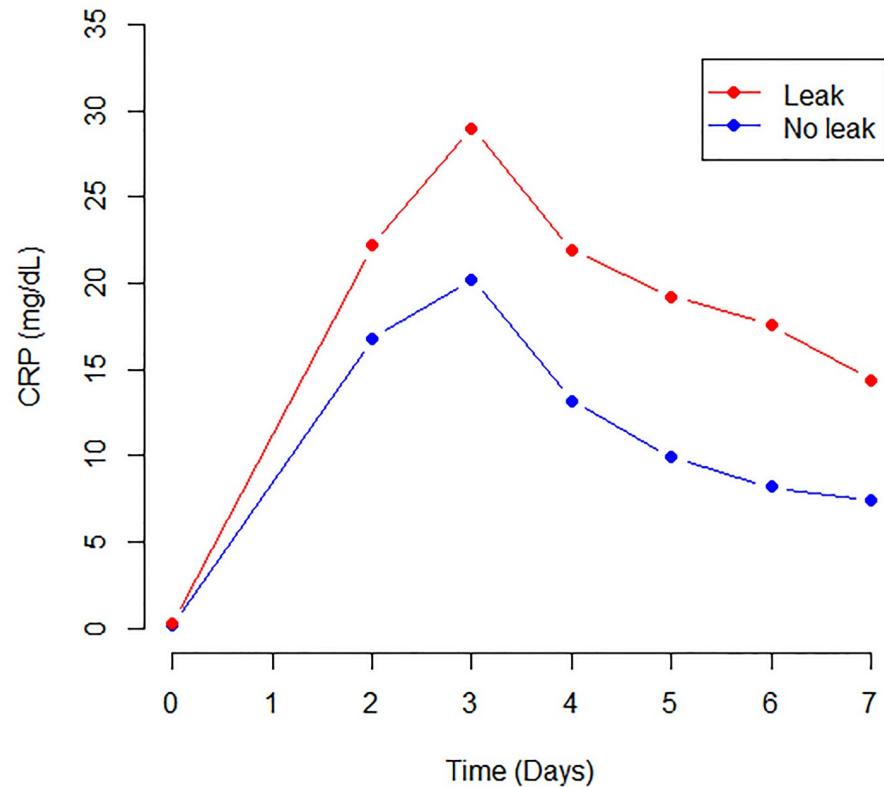

**Fig 3. Pooled post-operative CRP levels in the two patients groups ( $p < 0.05$ ).**

<https://doi.org/10.1371/journal.pone.0209272.g003>

128.64). The calculated correlation between sensitivity and specificity was 0.075 suggesting no threshold effect.

The estimated pooled POD5 CRP cut-off, resulting from 3 studies with 604 patients, is 13.2 mg/dl (95% CI 8.3–16.7 mg/dl). The estimated pooled sensitivity is 0.86 (95% CIs 0.67–0.96) (Fig 8a) and the pooled specificity is 0.62 (95% CIs 0.53–0.70) (Fig 8b). The estimated pooled AUC is 0.83 (95% CIs 0.61–0.96). The summary ROC curve and the summary estimates of sensitivity and specificity are reported in Fig 9. The pooled positive LR is 2.22 (95% CIs 1.48–3.00) and the pooled negative LR is 0.195 (95% CIs 0.04–0.52). The diagnostic OR is 9.66 (95%

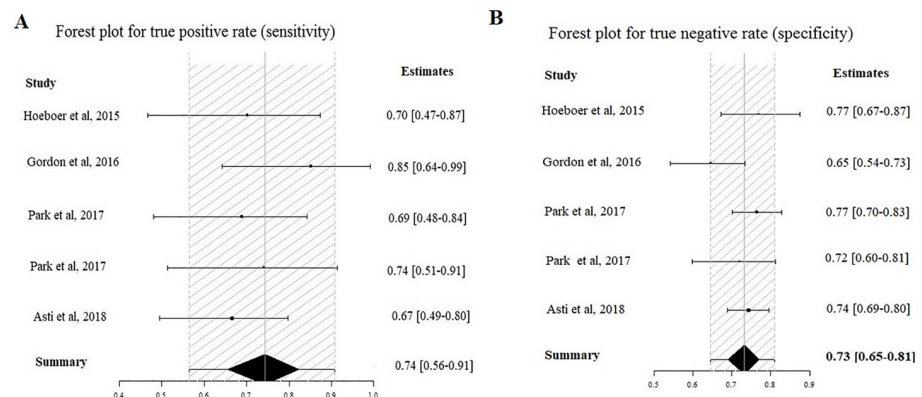

**Fig 4. Forrest plot for POD3: Estimated pooled sensitivity (A) and specificity (B).**

<https://doi.org/10.1371/journal.pone.0209272.g004>



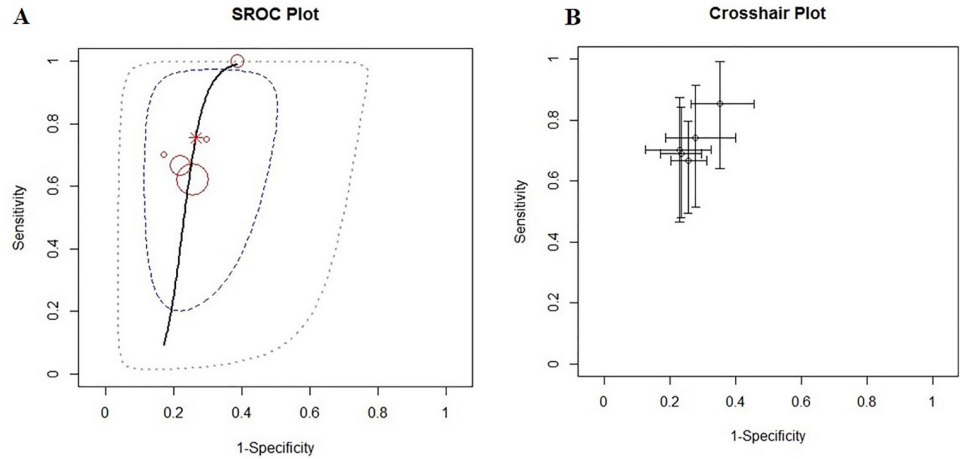

**Fig 5. Summary ROC curve (A), and cross air plot (B) for POD3.**

<https://doi.org/10.1371/journal.pone.0209272.g005>

CI 2.51–46.99). The calculated correlation between sensitivity and specificity was 0.022, suggesting no threshold effect.

The estimated pooled prevalence of anastomotic leak resulting from 5 studies, which include a total of 850 patients, is 11% (95% CI = 8–14%). The Fagans’ nomograms for POD3 and POD5 are shown in Fig 10.

### Discussion

This systematic review and meta-analysis shows that serum CRP concentration measured on POD3, POD4, and POD5 after esophagectomy may be useful test to rule out anastomotic leakage. After surgery, many patients who do not develop anastomotic leak may reveal a severe systemic inflammatory response with increased CRP levels related to the severity of surgical trauma, blood loss, and duration of operation [30–32]. Therefore, CRP is mostly valuable as a negative test, and a low CRP level on POD3 and POD5 may help to predict patients who are unlikely to develop an anastomotic leak.

The pooled incidence of anastomotic leak was 11% (95% CI = 8–14%). The peak value of CRP occurred on POD3 and was significantly higher in the AL compared to the NC group. The pooled CRP cut-off value on POD3, POD4, and POD5 were 17.6 mg/dl, 17.7 mg/dl, and 13.2 mg/dl respectively. The diagnostic accuracy is supported by the pooled AUC ROC curves.

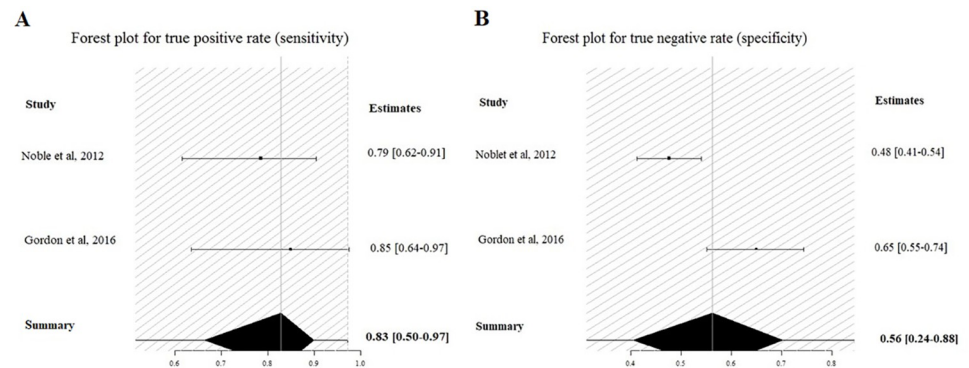

**Fig 6. Forrest plot for POD4: Estimated pooled sensibility (A) and specificity (B).**

<https://doi.org/10.1371/journal.pone.0209272.g006>

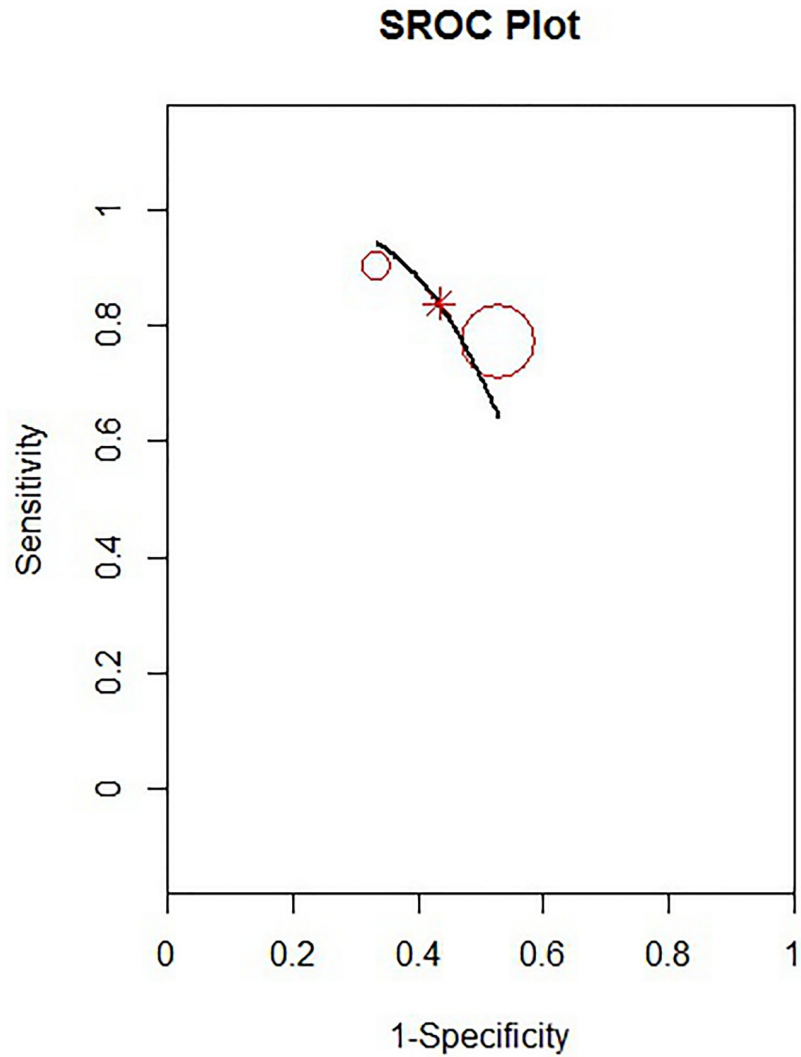

Fig 7. Summary ROC curve for POD4.

<https://doi.org/10.1371/journal.pone.0209272.g007>

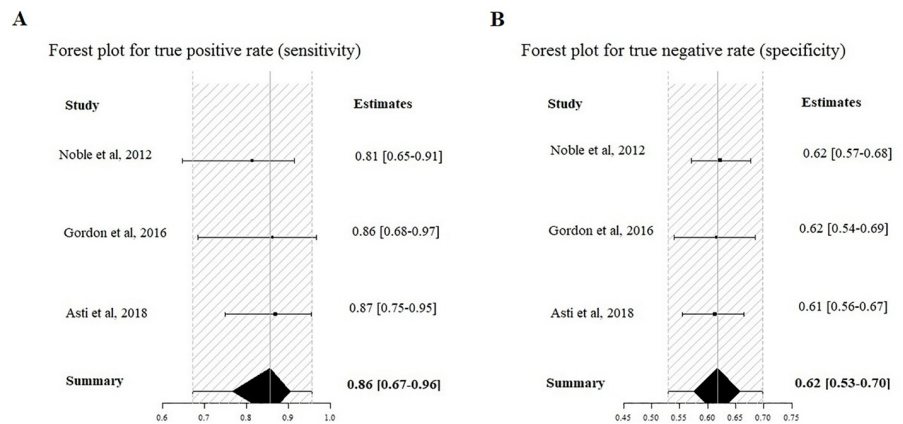

Fig 8. Forrest Plot for POD5: Estimated pooled sensitivity (A) and specificity (B).

<https://doi.org/10.1371/journal.pone.0209272.g008>



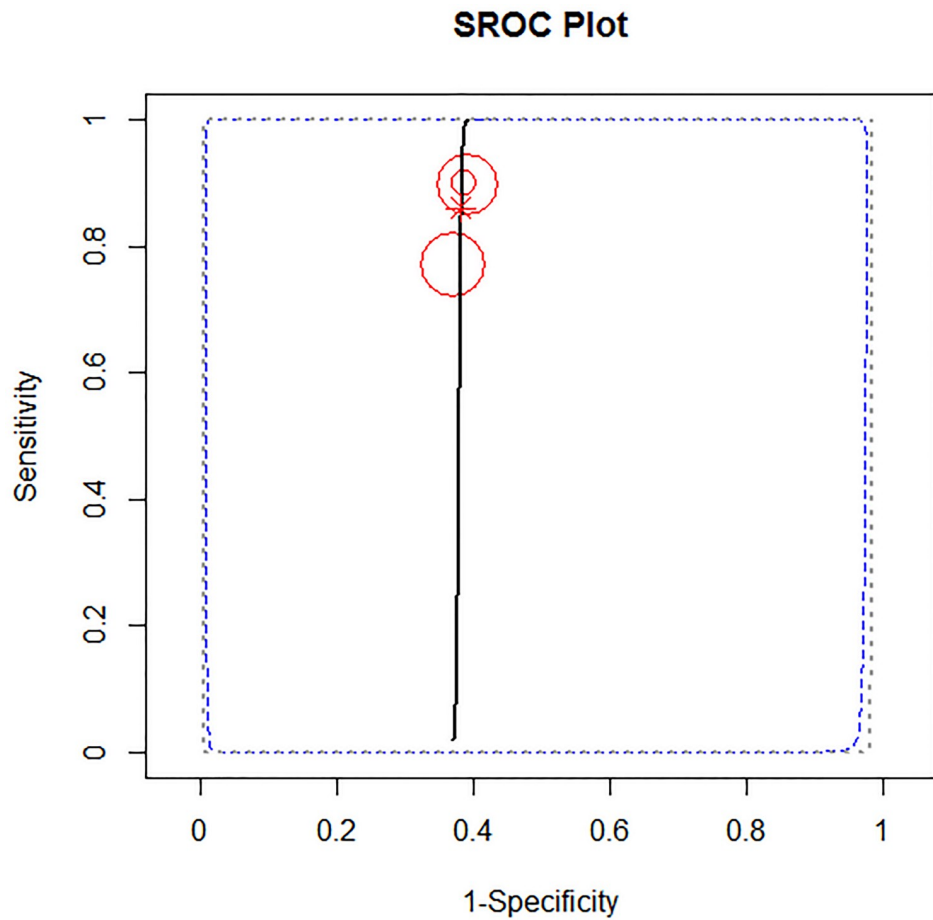

Fig 9. Summary ROC curve for POD5.

<https://doi.org/10.1371/journal.pone.0209272.g009>

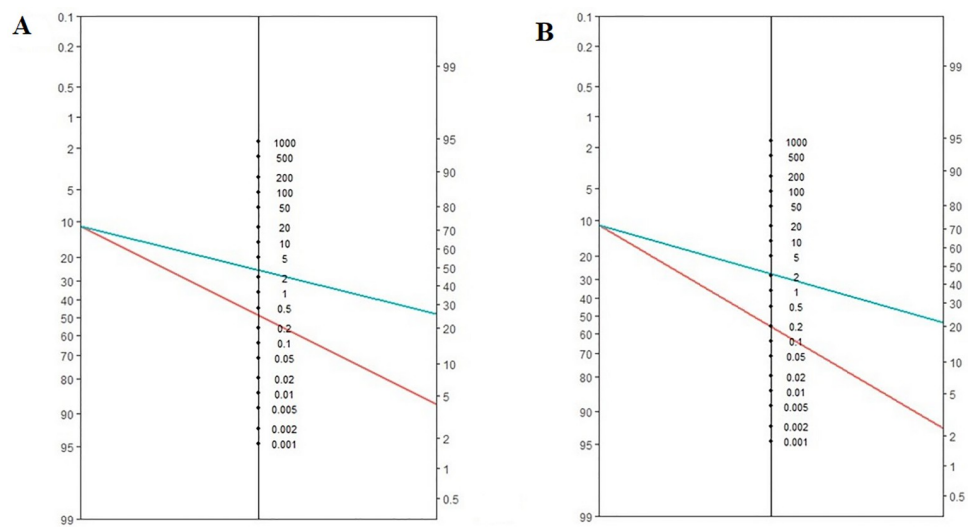

Fig 10. The Fagans' nomograms for POD3 (A) and POD5 (B).

<https://doi.org/10.1371/journal.pone.0209272.g010>

The negative predictive value, which is indeed useful to measure the accuracy of a predictive test, appears less consistent when applied to an individual patient. Conversely, LRs are more precise in estimating the diagnostic probability of a single test, thus providing an individual risk assessment. Therefore, in clinical practice, positive LR is relevant to confirm (rule-in), while negative LR is relevant to exclude disease/complication (rule-out) [33–34]. The pooled positive LRs indicate a weak evidence to diagnose anastomotic leak on POD 3 (LR+ 2.78), POD4 (LR+ 1.88), and POD 5 (LR+ 2.22). On the other hand, the LR- showed moderate evidence to rule-out leakage on POD 5 (LR- 0.195). This means that for a low-risk patient, with a pretest probability of 11% and a negative test on POD5 (CRP <13.2 mg/dl), the probability of having an anastomotic leak is almost 2% (Fig 10). Notably, the lower limit of CIs of LR- for CRP on POD3, POD 4, and POD5 were 0.096, 0.03 and 0.06, respectively. This suggests that, in the absence of clinical and/or radiological suspicion, CRP may provide solid evidence to rule out leakage.

Despite an overall significant progress in the management of esophageal cancer, anastomotic leak potentially remains a fatal consequence of esophagectomy. Early detection and treatment of this complication is critical to optimize perioperative care, minimize surgical complications, and expediting recovery. It has been shown that the application of Enhanced Recovery after Surgery (ERAS) programs for esophagectomy is associated with favorable overall morbidity and mortality, and reduced hospital length of stay [35–40]. However, the methodological quality of these studies is limited [41–42]. Identifying a clinically relevant CRP cut-off may be a helpful adjunct to the fast-track pathways by providing an early alert for leakage, selecting patients for diagnostic studies, and tailoring the therapeutic interventions. Integration of a CRP-based algorithm in clinical practice may lead to reduction of clinical burden and costs associated with anastomotic leak.

The main result of the present study was a significant association between postoperative CRP levels and anastomotic leak. However, given the relevant sensibility, specificity and the AUC combined with significant LR- on POD3 and POD5, postoperative CRP values may be useful to exclude (rule-out) rather than diagnose (rule-in) anastomotic leak after elective esophagectomy. Therefore, in the context of a fast-track recovery protocol, CRP could be used for early diet advancement and safe discharge home, respectively [6]. On the other hand, early diagnosis of anastomotic leakage by radiology and/or endoscopy is critical to provide immediate treatment by means of antibiotic therapy, placement of naso-jejunal feeding tube, stenting with or without percutaneous drainage, or endoVAC therapy, possibly reducing the rate of surgical revision [43–44].

Owing to differences in patient population, study design and methodology, this meta-analysis is limited by the heterogeneity of the included studies. Four of the five studies were retrospective and one had a prospective design. In addition, the various surgical approaches and techniques, the different definitions of anastomotic leak, and the effect of neoadjuvant treatment may contribute to inter-study heterogeneity [45]. However, postoperative CRP measurements were performed in all patients, thus reducing the possibility of diagnostic accuracy overestimation. Results for POD 4 were limited due to the fact that only two studies were included. Finally, it should be considered that longitudinal studies with repeated measurements taken over time are more reliable in establishing causality [46]. To the best of our knowledge, this is the first meta-analysis that assessed the prognostic value of CRP to rule-out anastomotic leak after esophageal resection. Although meta-analysis is not a widely approved method for summarizing predictive data, the cut-off values recommended in the present study can be used to interpret postoperative CRP measurements and may be integrated in ERAS protocols. Further prospective, high-quality studies are needed to validate the results of this meta-analysis.

## Conclusions

Increased postoperative levels of CRP may be associated with anastomotic leakage after esophagectomy. A CRP value lower than cut-off values of 17.6 mg/dl on POD3 and 13.2 mg/dl on POD5 may be useful to rule-out leakage. In the context of ERAS protocols, this may help to avoid contrast radiological studies, anticipate oral feeding, accelerate hospital discharge, and reduce costs.

## Supporting information

**S1 Checklist.** A checklist displaying which PRISMA items are described on what page of the manuscript.

(DOC)

## Acknowledgments

With the kind support of AIRES (Associazione Italiana Ricerca Esofago).

## Author Contributions

**Conceptualization:** Alberto Aiolfi, Emanuele Rausa, Luigi Bonavina.

**Data curation:** Alberto Aiolfi, Giulia Bonavina.

**Formal analysis:** Alberto Aiolfi, Emanuele Asti, Emanuele Rausa, Gianluca Bonitta, Luigi Bonavina.

**Investigation:** Alberto Aiolfi, Emanuele Rausa, Giulia Bonavina, Luigi Bonavina.

**Methodology:** Emanuele Asti, Emanuele Rausa, Giulia Bonavina, Gianluca Bonitta, Luigi Bonavina.

**Software:** Gianluca Bonitta.

**Supervision:** Luigi Bonavina.

**Writing – original draft:** Alberto Aiolfi, Emanuele Rausa, Luigi Bonavina.

**Writing – review & editing:** Luigi Bonavina.

## References

1. Schmidt HM, Gisbertz SS, Moons J, Rouvelas I, Kauppi J, Brown A, et al. Defining benchmarks for transthoracic esophagectomy. A multicenter analysis of total minimally invasive esophagectomy in low risk patients. *Ann Surg* 2017; Nov; 266(5):814–821. <https://doi.org/10.1097/SLA.0000000000002445> PMID: 28796646
2. Low DE, Alderson D, Ceconello I, Chang AC, Darling GE, D'Journo XB, et al. International consensus on standardization of data collection for complications associated with esophagectomy. *Ann Surg* 2015; 262:286–294. <https://doi.org/10.1097/SLA.0000000000001098> PMID: 25607756
3. Kassis ES, Kosinski AS, Ross P Jr, Koppes KE, Donahue JM, Daniel VC. Predictors of anastomotic leak after esophagectomy: an analysis of the society of thoracic surgeons general thoracic database. *Ann Thorac Surg* 2013; 96:1919–26. <https://doi.org/10.1016/j.athoracsur.2013.07.119> PMID: 24075499
4. Bonavina L, Scolari F, Aiolfi A, Bonitta G, Sironi A, Saino G, et al. Early outcome of thoracoscopic and hybrid esophagectomy: propensity-matched comparative analysis. *Surgery* 2016; 159:1073–1081. <https://doi.org/10.1016/j.surg.2015.08.019> PMID: 26422764
5. Biere SS, van Berge Henegouwen MI, Bonavina L, Rosman C, Roig Garcia J, Gisbertz SS, et al. Predictive factors for post-operative respiratory infections after esophagectomy for esophageal cancer: outcome of randomized trial. *J Thorac Dis* 2017; 9:S861–S867. <https://doi.org/10.21037/jtd.2017.06.61> PMID: 28815084

6. Asti E, Bonitta G, Melloni M, Tornese S, Milito P, Sironi A, et al. Utility of C-reactive protein as predictive biomarker of anastomotic leak after minimally invasive esophagectomy. *Langenbecks Arch Surg*. 2018 Mar; 403(2):235–244. <https://doi.org/10.1007/s00423-018-1663-4> PMID: 29516256
7. Straatman J, Harmsen AM, Cuesta MA, Berkhof J, Jansma EP, van der Peet DL. Predictive value of C-Reactive Protein for major complications after major abdominal surgery: a systematic review and pooled-analysis. *PLoS One* 2015; 10:e0132995. <https://doi.org/10.1371/journal.pone.0132995> PMID: 26177542
8. Adamina M, Steffen T, Tarantino I, Beutner U, Schmied BM, Warschkow R. Meta-analysis of the predictive value of C-reactive protein for infectious complications in abdominal surgery. *Br J Surg* 2015; 102:590–598. <https://doi.org/10.1002/bjs.9756> PMID: 25776855
9. Hoeboer SH, Groeneveld AB, Engels N, van Genderen M, Wijnhoven BP, van Bommel J. Rising C-Reactive Protein and Procalcitonin levels precede early complications after esophagectomy. *J Gastro-intest Surg* 2015; 19:613–624. <https://doi.org/10.1007/s11605-015-2745-z> PMID: 25663633
10. Miki Y, Toyokawa T, Kubo N, Tamura T, Sakurai K, Tanaka H, et al. C-Reactive Protein indicates early stage of postoperative infectious complications in patients following minimally invasive esophagectomy. *World J Surg* 2017; 41:796–803. <https://doi.org/10.1007/s00268-016-3803-8> PMID: 27878351
11. Park JK, Kim JJ, Moon SW. C-reactive protein for the early prediction of anastomotic leak after esophagectomy in both neo-adjuvant and non-neoadjuvant therapy case: a propensity score matching analysis. *J Thorac Dis* 2017; 9(10):3963–702. <https://doi.org/10.21037/jtd.2017.08.125> PMID: 29268376
12. Warschkow R, Tarantino I, Ukegijini K, Beutner U, Müller SA, Schmied BM, et al. Diagnostic study and meta-analysis of C-reactive protein as a predictor of postoperative inflammatory complications after gastroesophageal cancer surgery. *Langenbecks Arch Surg* 2012; 397: 727–736. <https://doi.org/10.1007/s00423-012-0944-6> PMID: 22398436
13. Singh PP, Zeng IS, Srinivasa S, Lemanu DP, Connolly AB, Hill AG. Systematic review and meta-analysis of use of serum C-reactive protein levels to predict anastomotic leak after colorectal surgery. *Br J Surg*. 2014 Mar; 101(4):339–46. <https://doi.org/10.1002/bjs.9354> PMID: 24311257
14. Findlay JM, Tustian E, Millo J, Klucniks A, Sgromo B, Marshall RE, et al. The effect of formalizing enhanced recovery after esophagectomy with a protocol. *Dis Esophagus*. 2015; 28(6):567–73. <https://doi.org/10.1111/dote.12234> PMID: 24835109
15. Paireder M, Jomrich G, Asari R, Kristo I, Gleiss A, Preusser M, et al. External validation of the NUN score for predicting anastomotic leakage after oesophageal resection. *Sci Rep*. 2017; 7(1):9725. <https://doi.org/10.1038/s41598-017-10084-9> PMID: 28852063
16. Moher D, Liberati A, Tetzlaff J, Altman DG; PRISMA Group. Preferred reporting items for systematic reviews and meta-analyses: the PRISMA statement. *PLoS Med*. 2009;21; 6(7):e1000097. <https://doi.org/10.1371/journal.pmed.1000097> PMID: 19621072
17. Whiting PF, Rutjes AW, Westwood ME, Mallett S, Deeks JJ, Reitsma JB, et al. QUADAS-2: a revised tool for the quality assessment of diagnostic accuracy studies. *Ann Intern Med* 2011; 155: 529–536. <https://doi.org/10.7326/0003-4819-155-8-201110180-00009> PMID: 22007046
18. Mila AL, Ngugi HK. A Bayesian approach to meta-analysis of plant pathology studies. *Phytopathology*. 2011; 101:42–51. <https://doi.org/10.1094/PHTO-03-10-0070> PMID: 20822433
19. Sutton AJ, Abrams KR. Bayesian methods in meta-analysis and evidence synthesis. *Stat. Methods Med. Res*. 2001; 10:277–303. <https://doi.org/10.1177/096228020101000404> PMID: 11491414
20. Higgins JP, Thompson SG, Spiegelhalter DJ. A re-evaluation of random-effects meta-analysis. *J R Stat Soc Ser A Stat Soc* 2009; 172:137–159. <https://doi.org/10.1111/j.1467-985X.2008.00552.x> PMID: 19381330
21. Chu H, Cole SR. Bivariate meta-analysis of sensitivity and specificity with sparse data: A generalized linear mixed model approach. *J Clin Epidemiol*. 2006 Dec; 59(12):1331–1332. <https://doi.org/10.1016/j.jclinepi.2006.06.011> PMID: 17098577
22. Simpson DP, Martins TG, Riebler A, et al. H. Sørbye. Penalising model component complexity: A principled, practical approach to constructing priors. ArXiv e-prints, 2014
23. Wakefield J. Disease mapping and spatial regression with count data. *Biostatistics*, 8(2): 158–183, 2007. <https://doi.org/10.1093/biostatistics/kxl008> PMID: 16809429
24. Rutter CM, Gatsonis CA. A hierarchical regression approach to meta-analysis of diagnostic test accuracy evaluations. *Statistics in Medicine*, 20(19):2865–2884, 2001. PMID: 11568945
25. Asti E, Sozzi M, Bonitta G, Bernardi D, Bonavina L. Esophagectomy in patients with liver cirrhosis: a systematic review and Bayesian meta-analysis. *J Visc Surg*. 2018 Apr 10. [Epub ahead of print]. <https://doi.org/10.1016/j.jvisurg.2018.03.014> PMID: 29653854
26. <http://getdata-graph-digitizer.com> Accessed February 20th 2018

27. R Core Team. R: a language and environment for statistical computing. R Foundation for Statistical Computing [cited 2016 Mar 14]. [www.r-project.org](http://www.r-project.org) Accessed May 31, 2018
28. Noble F, Curtis N, Harris S, Kelly JJ, Bailey IS, Byrne JP, et al. Risk assessment using a novel score to predict anastomotic leak and major complications after oesophageal resection. *J Gastrointest Surg*. 2012 Jun; 16(6):1083–1095. <https://doi.org/10.1007/s11605-012-1867-9> PMID: 22419007
29. Gordon AC, Cross AJ, Foo EW, Roberts RH. C-reactive protein is a useful negative predictor of anastomotic leak in oesophago-gastric resection. *ANZ J Surg*. 2018 Mar; 88(3):223–227. <https://doi.org/10.1111/ans.13681> PMID: 27457697
30. Pittet D, Rangel-Frausto S, Li N, Tarara D, Costigan M, Rempel L, et al. Systemic inflammatory response syndrome, sepsis, severe sepsis and septic shock: incidence, morbidities and outcomes in surgical ICU patients. *Intensive Care Med* 1995; 21: 302–309. PMID: 7650252
31. Haga Y, Beppu T, Doi K, Nozawa F, Mugita N, Ikei S, et al. Systemic inflammatory response syndrome and organ dysfunction following gastrointestinal surgery. *Crit Care Med* 1997; 25: 1994–2000. PMID: 9403749
32. Pepys MB, Hirschfield GM. C-reactive protein: a critical update. *J Clin Invest* 2003; 111: 1805–1812. <https://doi.org/10.1172/JCI18921> PMID: 12813013
33. Akobeng AK. Understanding diagnostic tests 2: likelihood ratios, pre- and post-test probabilities and their use in clinical practice. *Acta Paediatr* 2007; 96: 487–491. <https://doi.org/10.1111/j.1651-2227.2006.00179.x> PMID: 17306009
34. Halkin A, Reichman J, Schwaber M, Paltiel O, Brezis M. Likelihood ratios: getting diagnostic testing into perspective. *QJM* 1998; 91: 247–258. PMID: 9666947
35. Cerfolio RJ, Bryant AS, Bass CS, Alexander JR, Bartolucci AA. Fast tracking after Ivor Lewis esophago-gastrectomy. *Chest*. 2004 Oct; 126(4):1187–94. <https://doi.org/10.1378/chest.126.4.1187> PMID: 15486381
36. Low DE, Kunz S, Schembre D, Otero H, Malpass T, Hsi A, et al. Esophagectomy—it's not just about mortality anymore: standardized perioperative clinical pathways improve outcomes in patients with esophageal cancer. *J Gastrointest Surg*. 2007 Nov; 11(11):1395–1402. <https://doi.org/10.1007/s11605-007-0265-1> PMID: 17763917
37. Jiang K, Cheng L, Wang JJ, Li JS, Nie J. Fast track clinical pathway implications in esophagogastrectomy. *World J Gastroenterol*. 2009 Jan 28; 15(4):496–501. <https://doi.org/10.3748/wjg.15.496> PMID: 19152457
38. Munitiz V, Martinez-de-Haro LF, Ortiz A, Ruiz-de-Angulo D, Pastor P, Parrilla P. Effectiveness of a written clinical pathway for enhanced recovery after transthoracic (Ivor Lewis) oesophagectomy. *Br J Surg*. 2010 May; 97(5):714–718. <https://doi.org/10.1002/bjs.6942> PMID: 20187171
39. Li C, Ferri LE, Mulder DS, Ncuti A, Neville A, Lee L, et al. An enhanced recovery pathway decreases duration of stay after esophagectomy. *Surgery*. 2012 Oct; 152(4):606–614. <https://doi.org/10.1016/j.surg.2012.07.021> PMID: 22943844
40. Cao S, Zhao G, Cui J, Dong Q, Qi S, Xin Y, et al. Fast-track rehabilitation program and conventional care after esophagectomy: a retrospective controlled cohort study. *Support Care Cancer*. 2013 Mar; 21(3):707–714. <https://doi.org/10.1007/s00520-012-1570-0> PMID: 22933129
41. Findlay JM, Gillies RS, Millo J, Sgromo B, Marshall RE, Maynard ND. Enhanced recovery for esophagectomy: a systematic review and evidence-based guidelines. *Ann Surg*. 2014 Mar; 259(3):413–431. <https://doi.org/10.1097/SLA.0000000000000349> PMID: 24253135
42. Parise P, Ferrari C, Cossu A, Puccetti F, Elmore U, De Pascale S, et al. Enhanced Recovery After Surgery (ERAS) Pathway in Esophagectomy: Is a Reasonable Prediction of Hospital Stay Possible? *Ann Surg*. 2018 Apr 18. [Epub ahead of print]. <https://doi.org/10.1097/SLA.0000000000002775> PMID: 29672400
43. Bonavina L, Asti E, Sironi A, Bernardi D, Aiolfi A. Hybrid and total minimally invasive esophagectomy: how I do it. *J Thorac Dis*. 2017 Jul; 9(Suppl 8):S761–S772. <https://doi.org/10.21037/jtd.2017.06.55> PMID: 28815072
44. Rausa E, Asti E, Aiolfi A, Bianco F, Bonitta G, Bonavina L. Comparison of endoscopic vacuum therapy versus endoscopic stenting for esophageal leaks: systematic review and meta-analysis. *Dis Esophagus*. 2018 Jun 25. [Epub ahead of print] <https://doi.org/10.1093/dote/doy060> PMID: 29939229
45. Yamashita K, Watanabe M, Mine S, Toihata T, Fukudome I, Okamura A, et al. Minimally invasive esophagectomy attenuates the postoperative inflammatory response and improves survival compared with open esophagectomy in patients with esophageal cancer: a propensity score matched analysis. *Surg Endosc*. 2018 Apr 11. <https://doi.org/10.1007/s00464-018-6187-z> PMID: 29644466
46. Frees EW. Longitudinal and Panel Data: Analysis and Applications in the Social Sciences. 2004 New York: Cambridge University Press.
